# Supplementary material for: Metal-organic nanostructures based on sono/chemo-nanodynamic synergy of TixOy/Ru reaction units: for ultrasound-induced dynamic cancer therapy
Source: Research Square preprint supplement (doi:10.21203/rs.3.rs-6273421/v1), 2025-04-25
Supplement: Supplementary file 1 [file 32663d9e683b898b34bbc516.docx]

**Metal-organic nanostructures based on sono/chemo-nanodynamic synergy of TixOy/Ru reaction units: for ultrasound-induced dynamic cancer therapy**

**Tao Jiang 1†, Zixiang Tang 1†, Shumiao Tian 3†, Haitian Tang 4, Zhekun Jia 4, Fangjian Li 1, Chenyue Qiu 3, Lin Deng 2, Lang Ke 3, Gang Liu 4*, Chengchao Chu 3*, Yongfu Xiong 1***

1Department of General Surgery, Academician (Expert) Workstation, Sichuan Digestive System Disease Clinical Medical Research Center, Affiliated Hospital of North Sichuan Medical College, Nanchong 637000, P. R. China.

2Department of Clinical Medicine, North Sichuan Medical College, Nanchong 637000, P. R. China.

3Xiamen University Affiliated Xiamen Eye Center, Eye Institute of Xiamen University, School of Medicine, Xiamen University, Xiamen, 361102, China.

4State Key Laboratory of Vaccines for Infectious Diseases, Xiang An Biomedicine Laboratory, School of Public Health, Xiamen University, Xiamen 361102, China


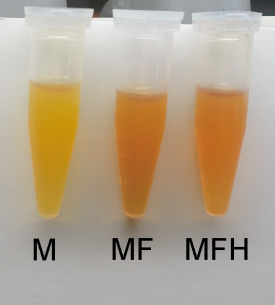


Fig. S1 The appearance images of the prepared M, MF and MFH.


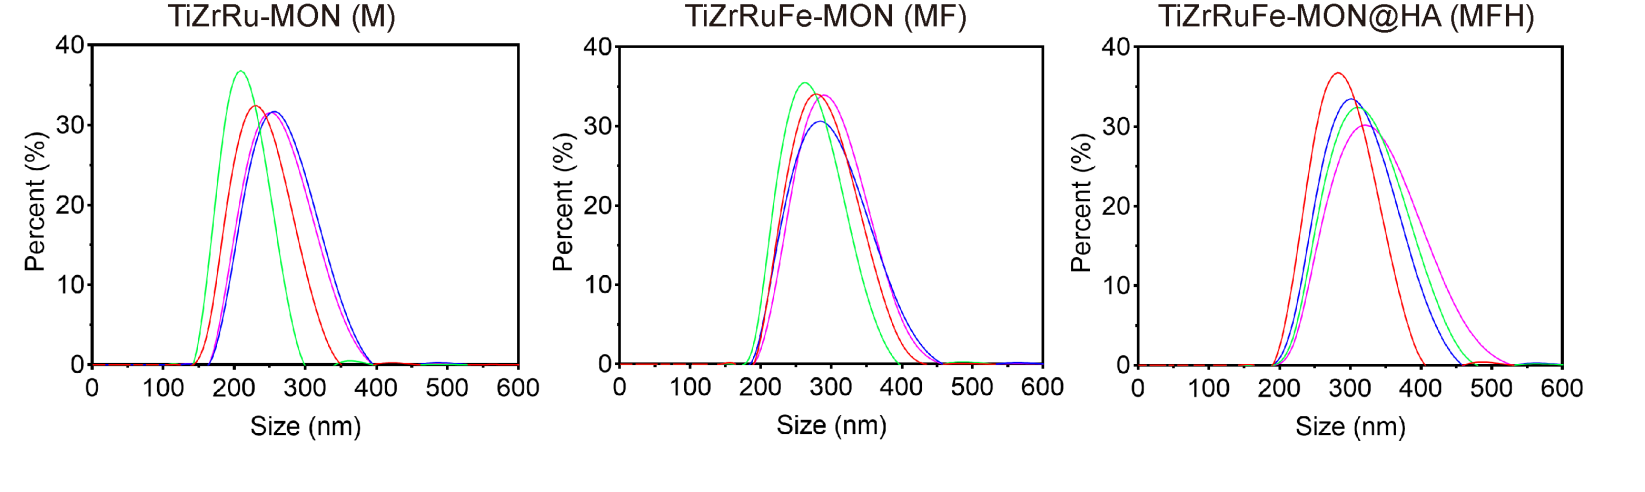


Fig. S2 The size of M, MF and MFH.


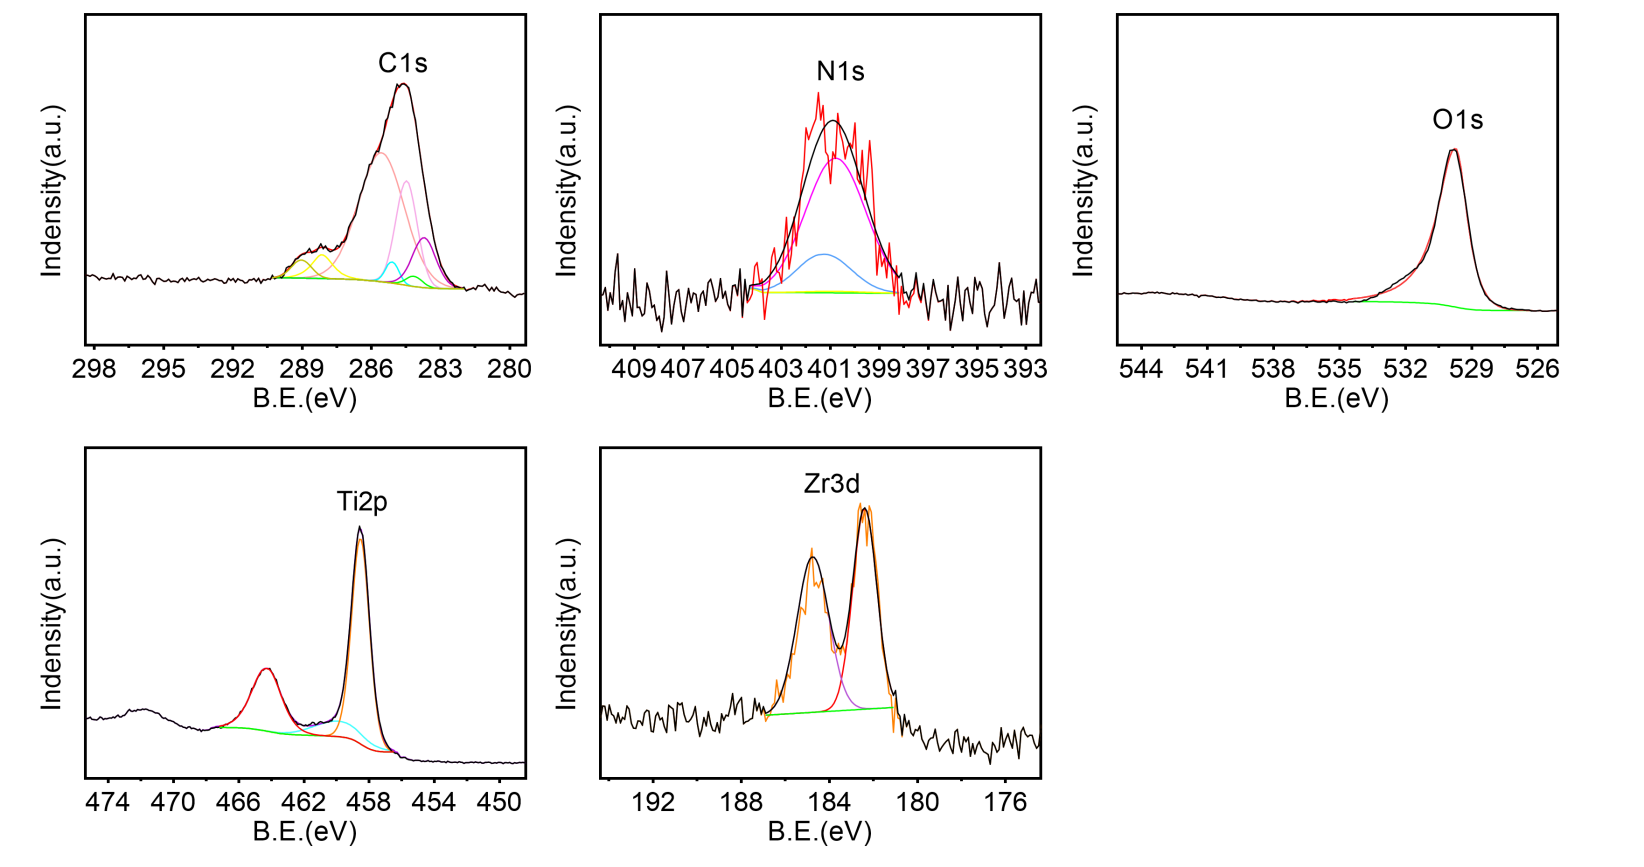


Fig. S3 XPS core-level C 1s, N1s, O1s, Ti2p and Zr3d.


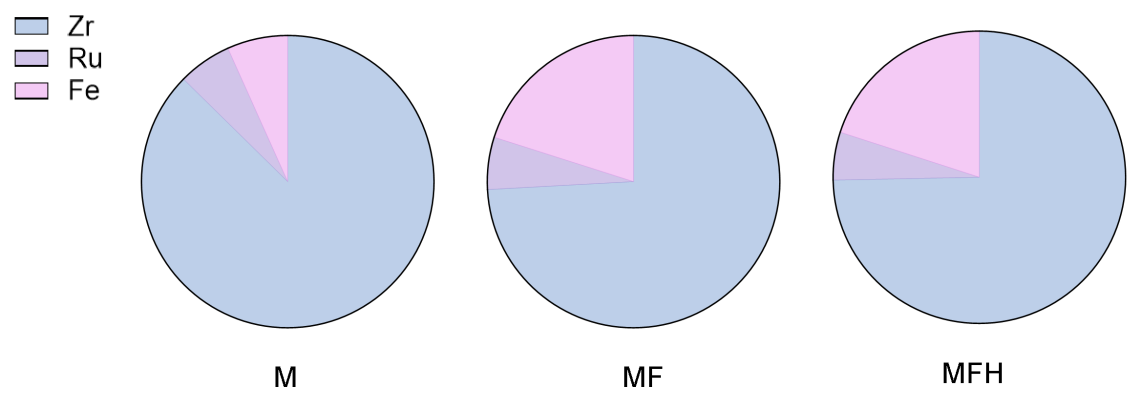


Fig. S4 Percentage of Zr, Ru, Fe in M, MF or MFH.


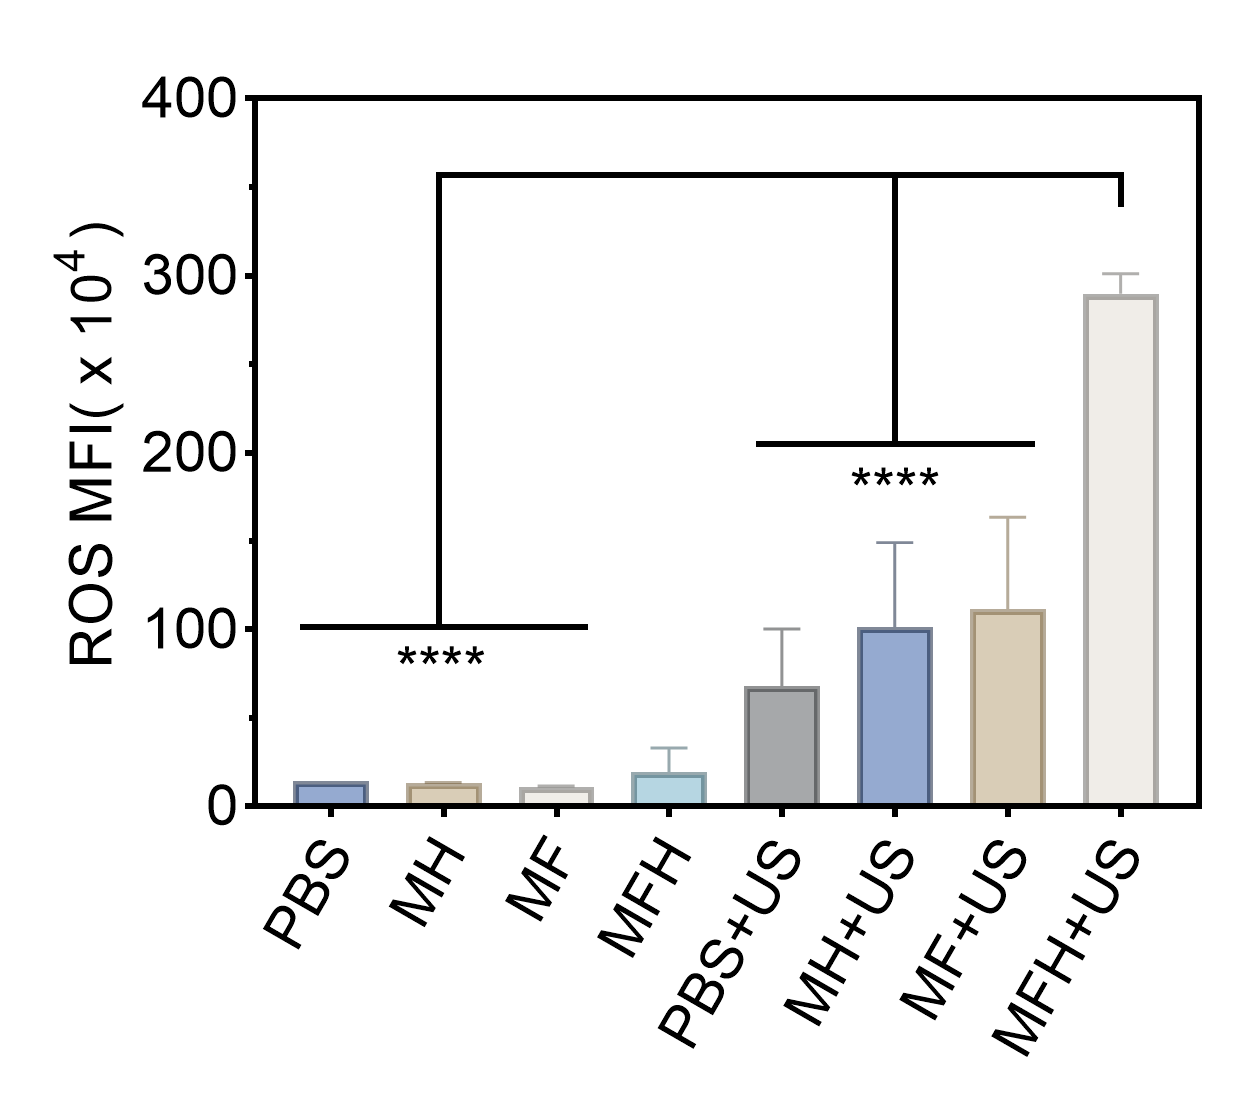


Fig. S5 Corresponding quantification of ROS production by flow cytometry.


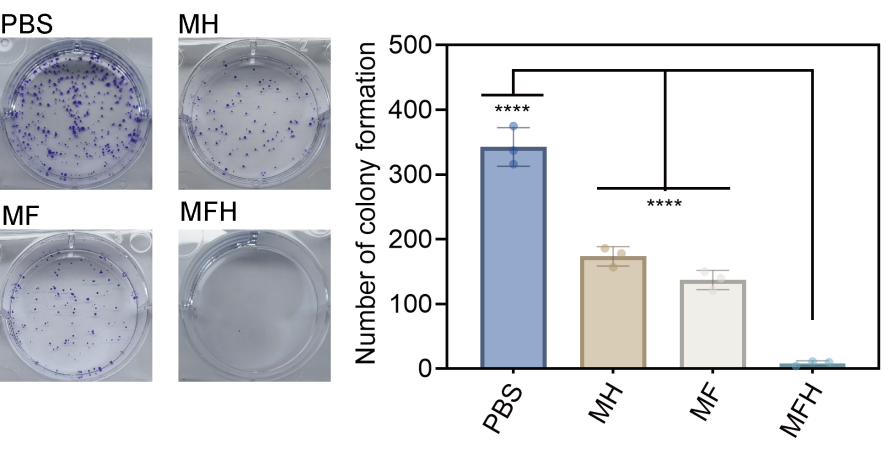


Fig. S6 Colony formation assays of PBS, MH, MF and MFH after US irradiation.


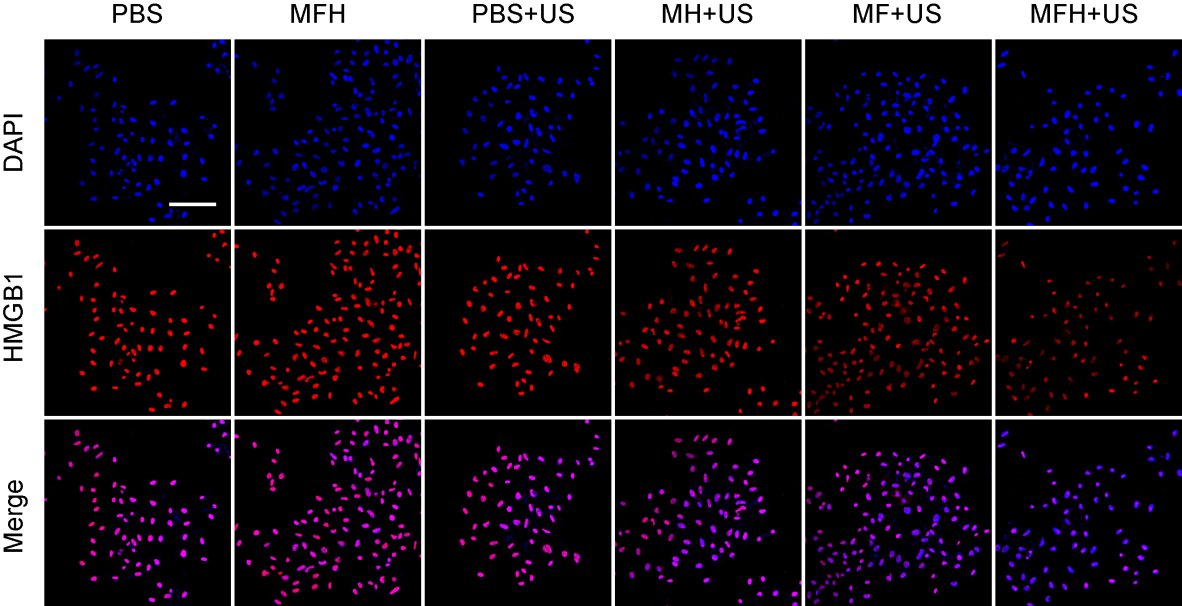


Fig.S7 CLSM images of the release of HMGB1 in Hepa 1-6 cells of PBS, MFH, PBS+US, MH+US, MF+US and MFH+US. Scale bar = 100 μm.


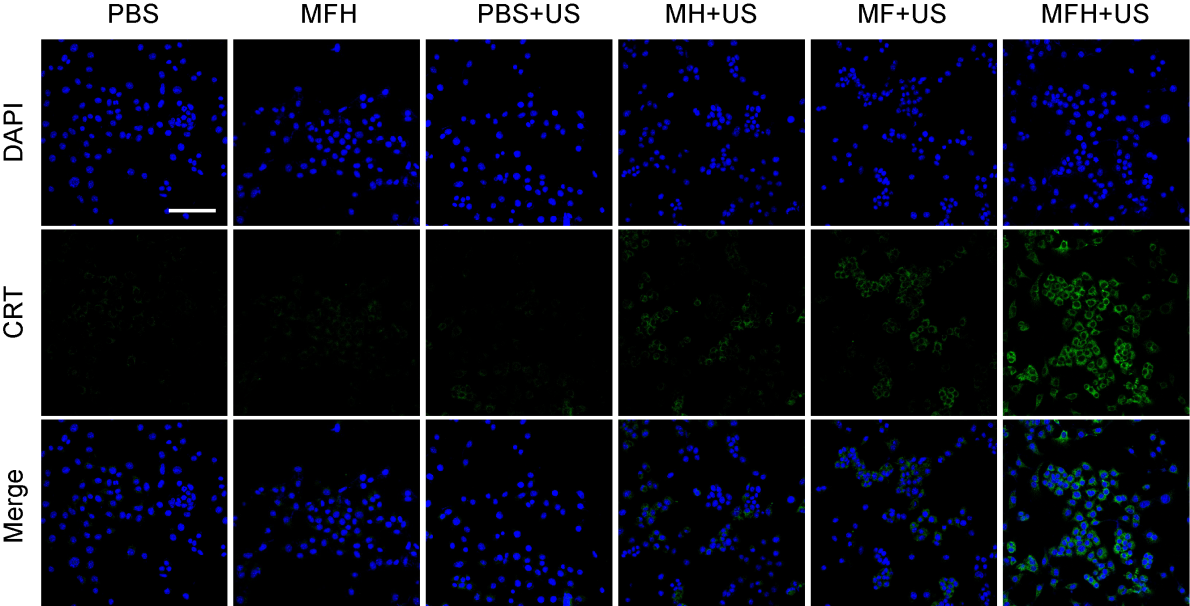


Fig. S8 CLSM images of the exposure of CRT in Hepa 1-6 cells of PBS, MFH, PBS+US, MH+US, MF+US and MFH+US. Scale bar = 100 μm.


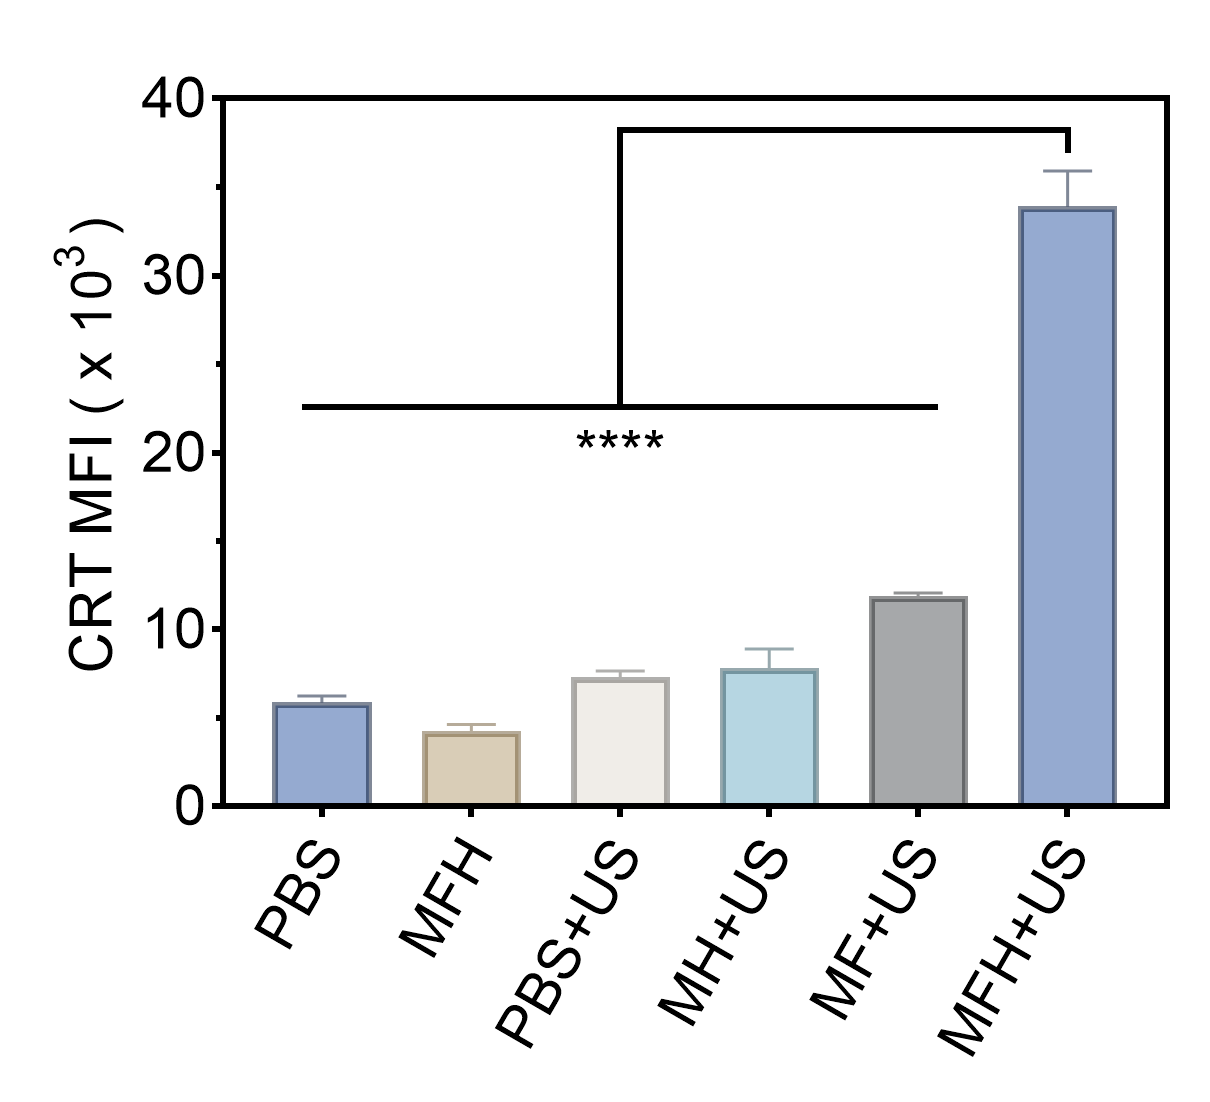


Fig. S9 Corresponding quantification of surface expression of CRT on Hepa1-6 cells.


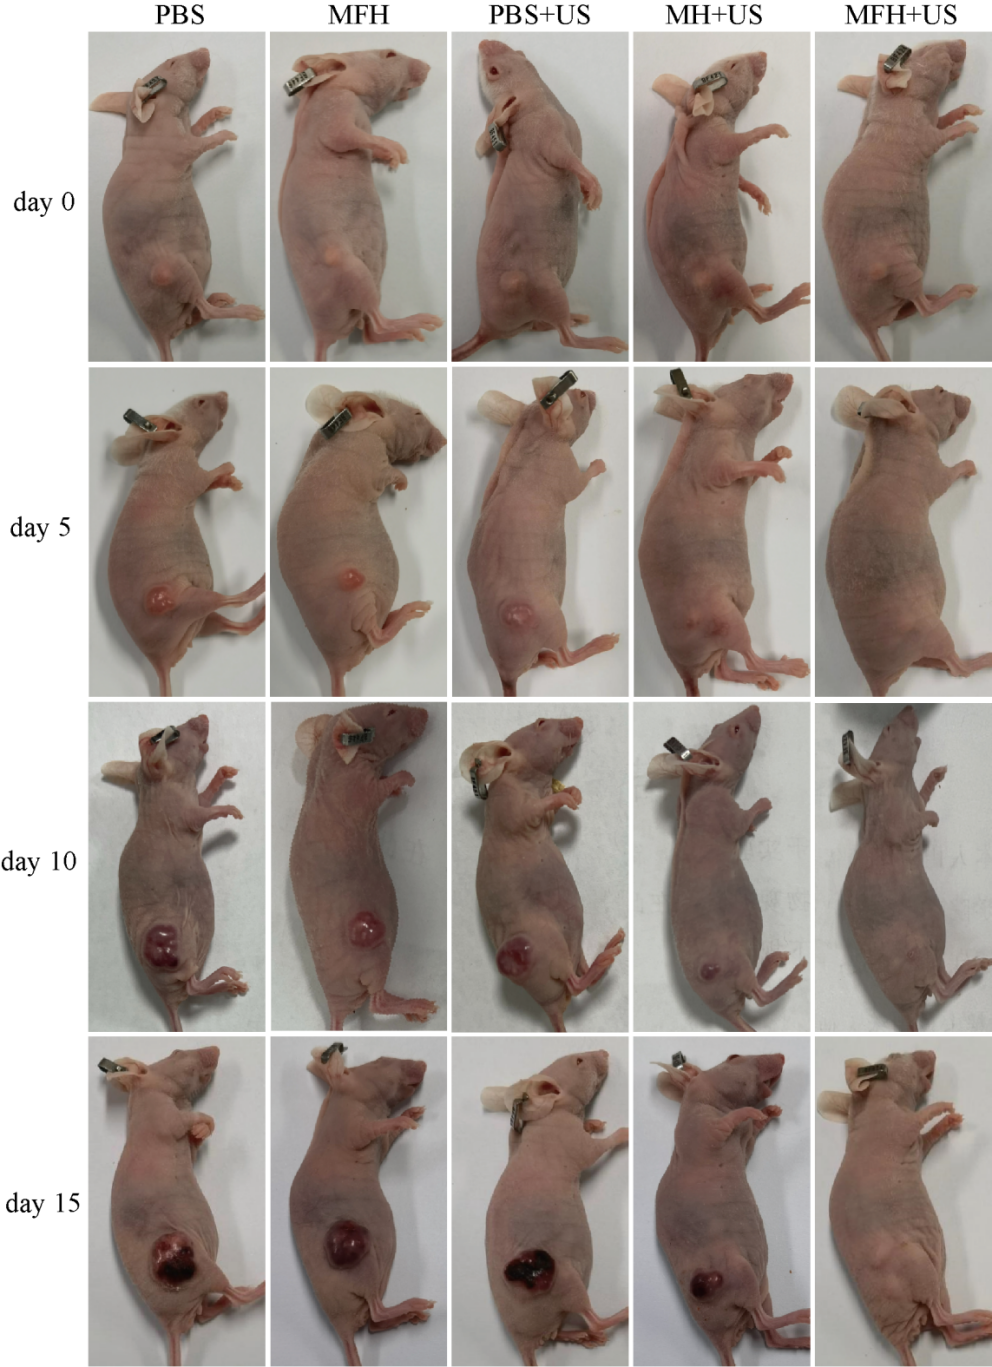


Fig. S10 Photographs of mice bearing HepG2 tumors with various treatments whthin 15 days.


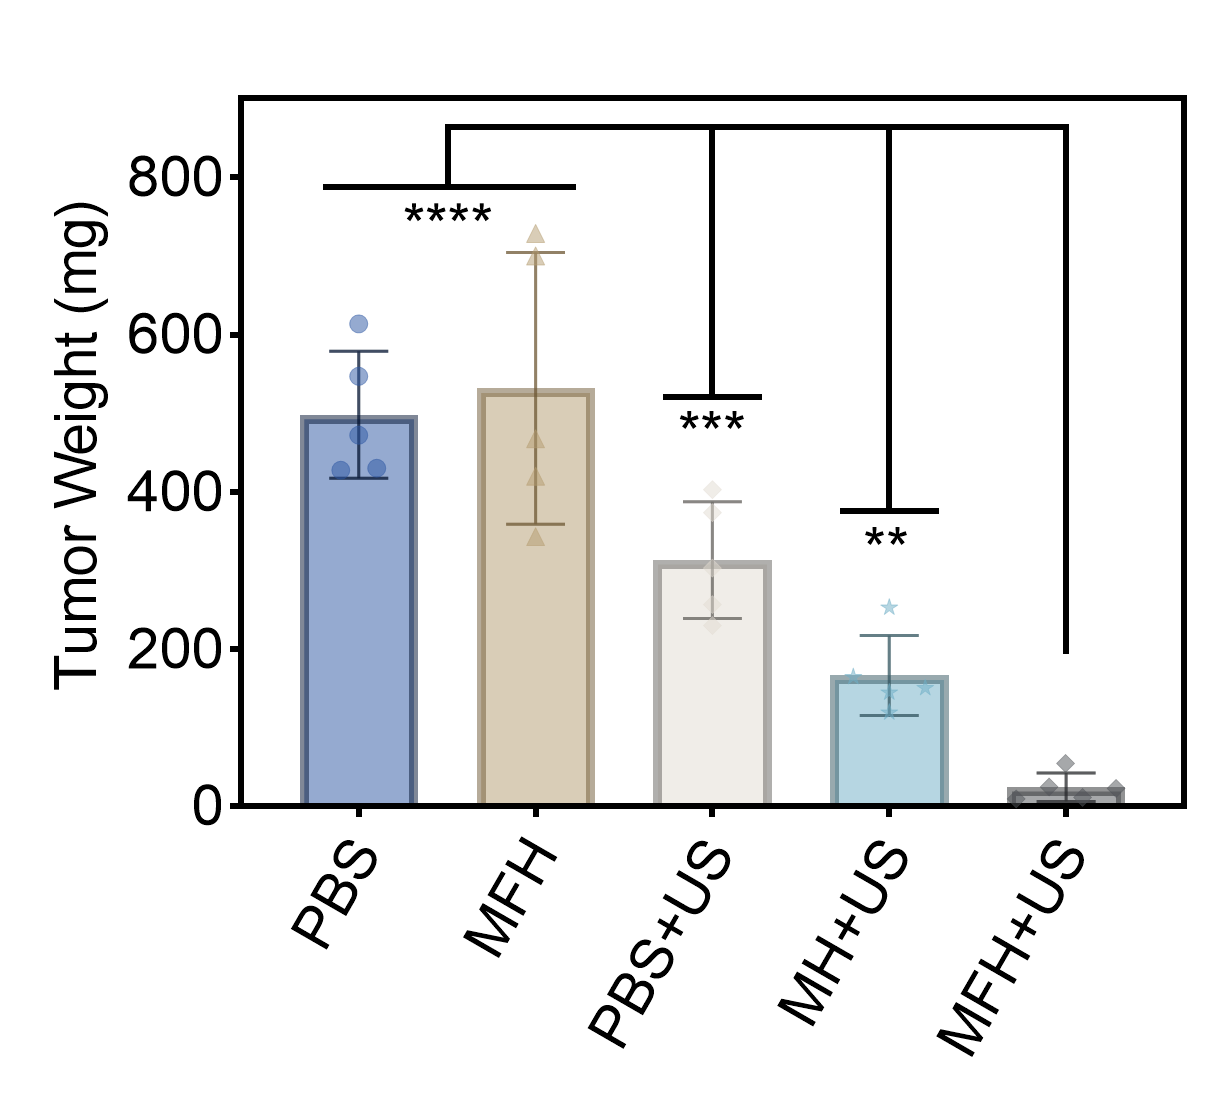


Fig. S11Tumor weight after various treatments.


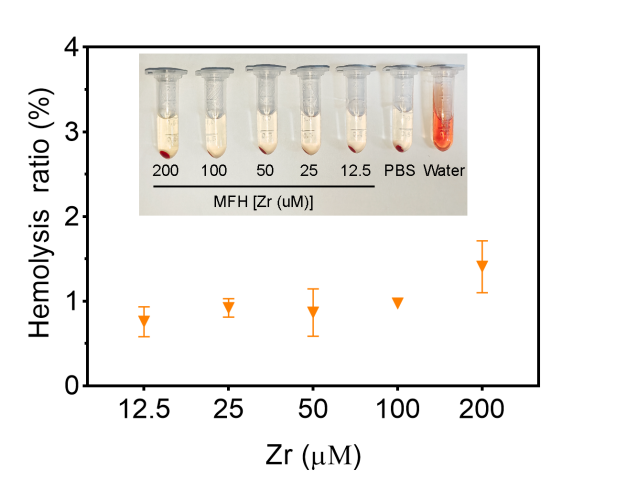


Fig. S12 The hemolysis study of MFH treated red blood cells.


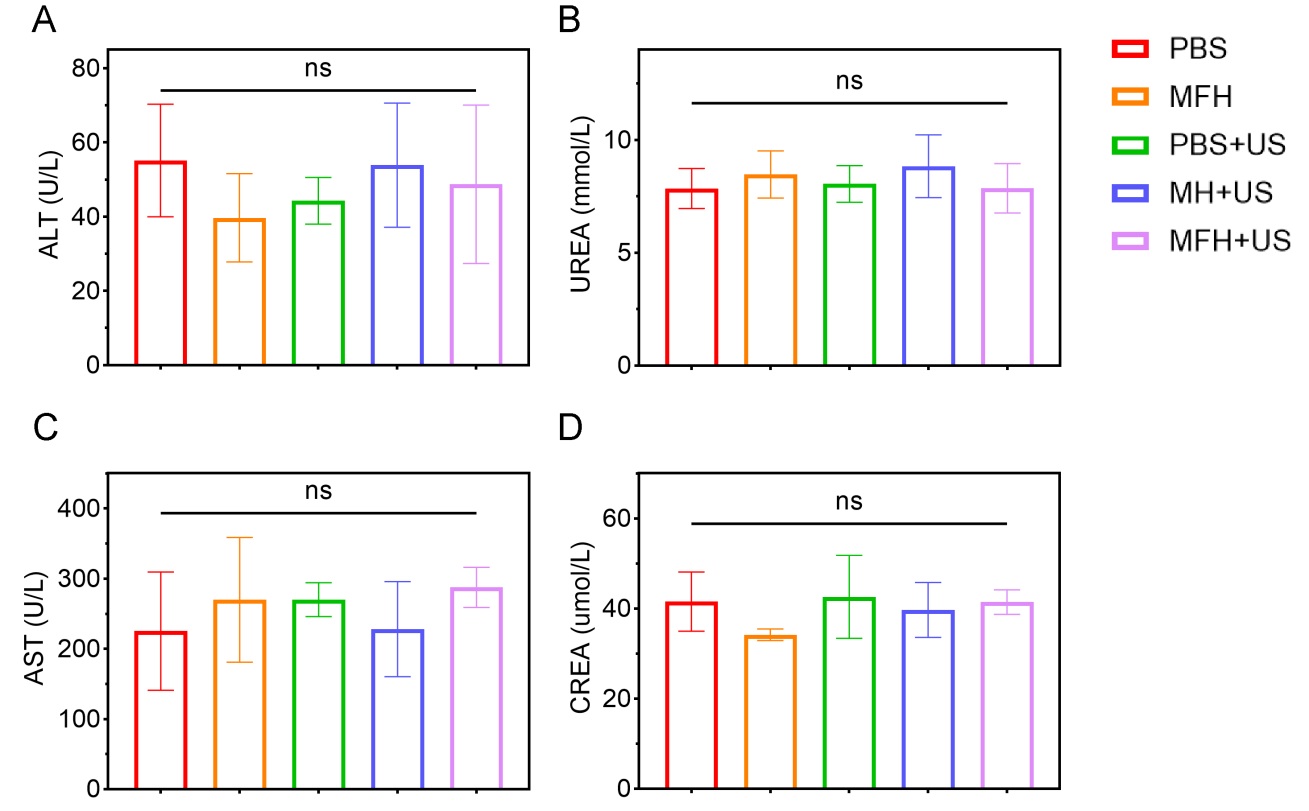


Fig. S13 Biochemical analysis of serum: (A) alanine aminotransferase (ALT); (B) UREA; (C) aspartate aminotransferase (AST); (D) serum creatinine (CREA).


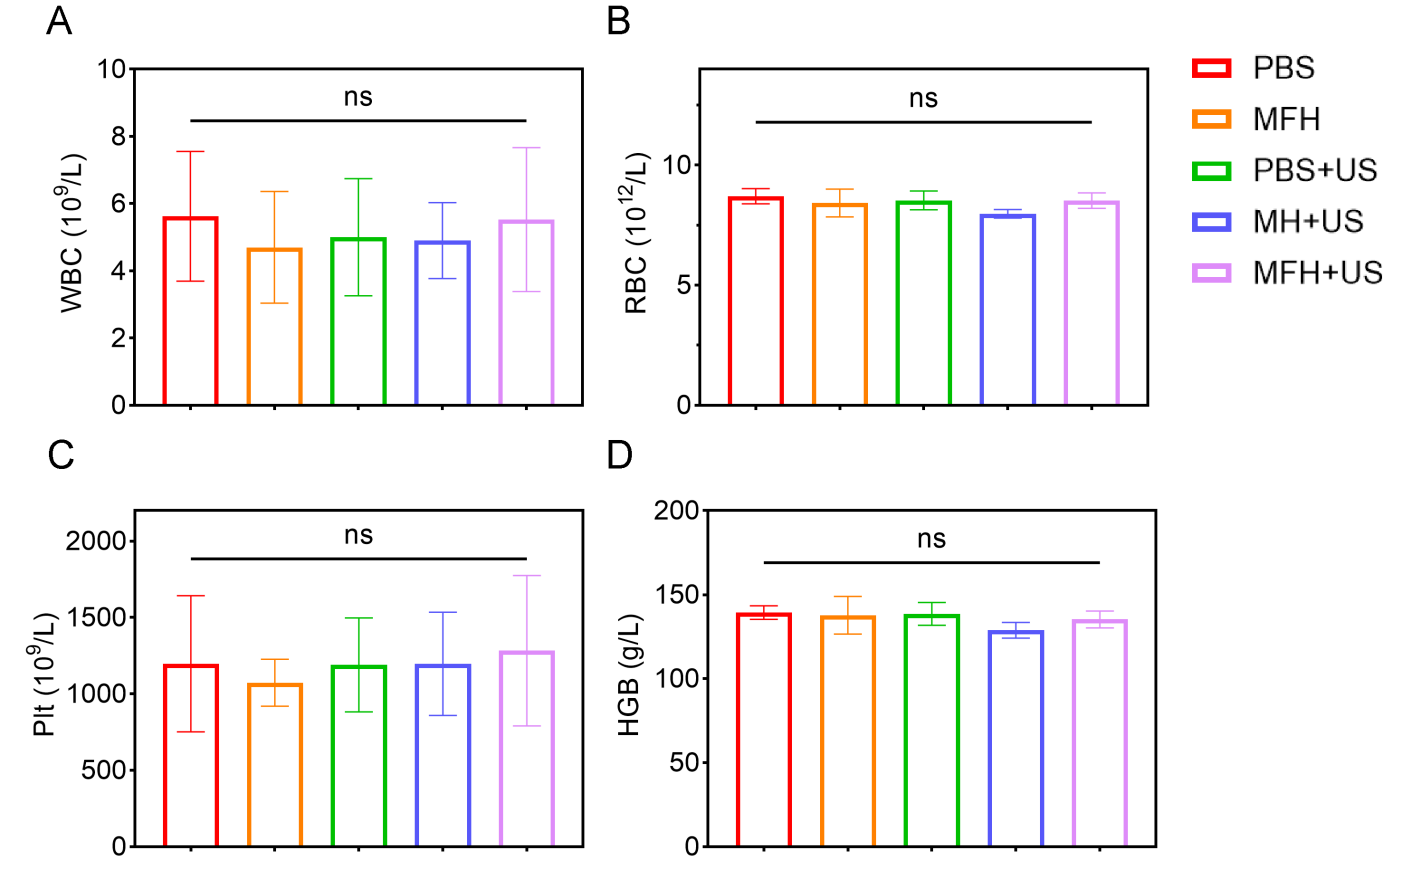


Fig. S14 The (A)WBC, (B) RBC, (C) Plt and (D) HGB parameters of the collected blood samples.


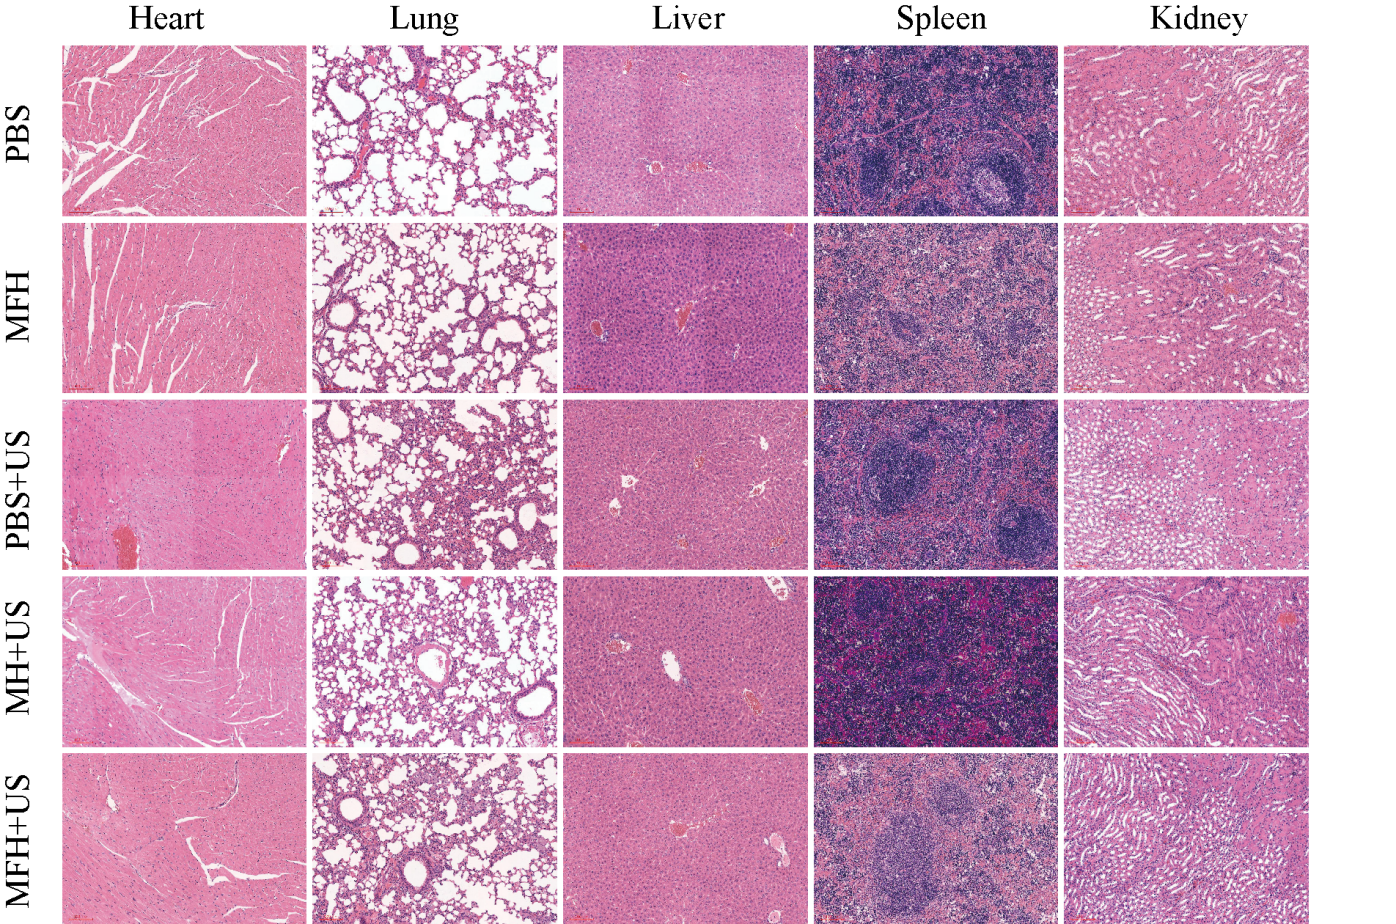


Fig. S15 H&E stained slice images of the main organs after various treatments.


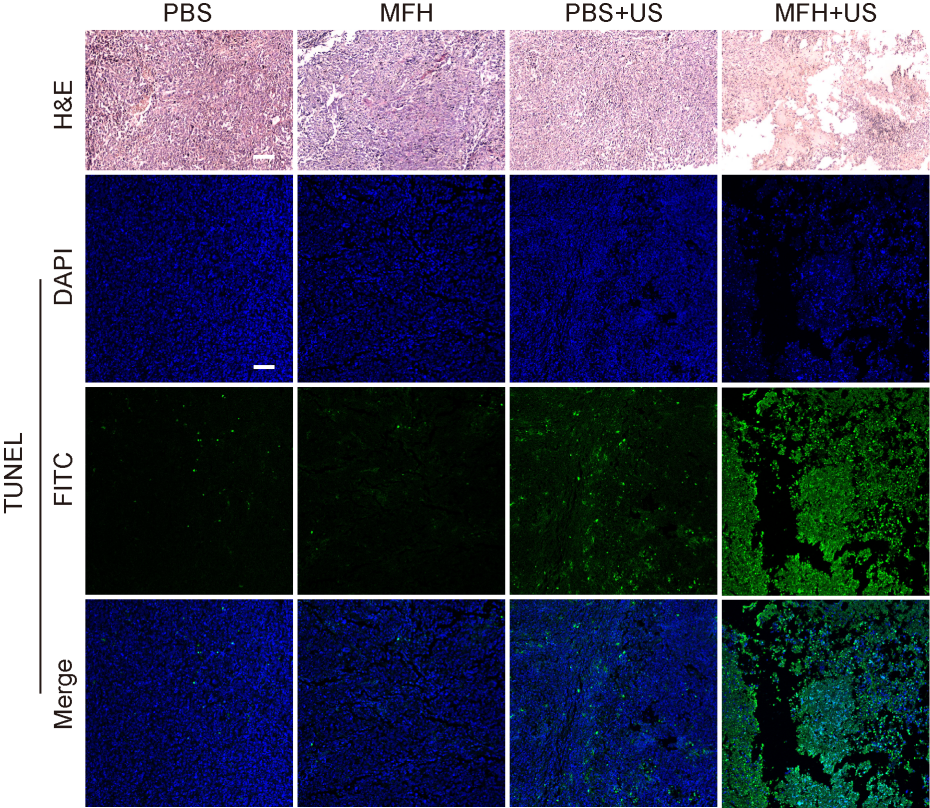


Fig. S16 H&E staining and TUNEL assay. Scarbar=100 μm.


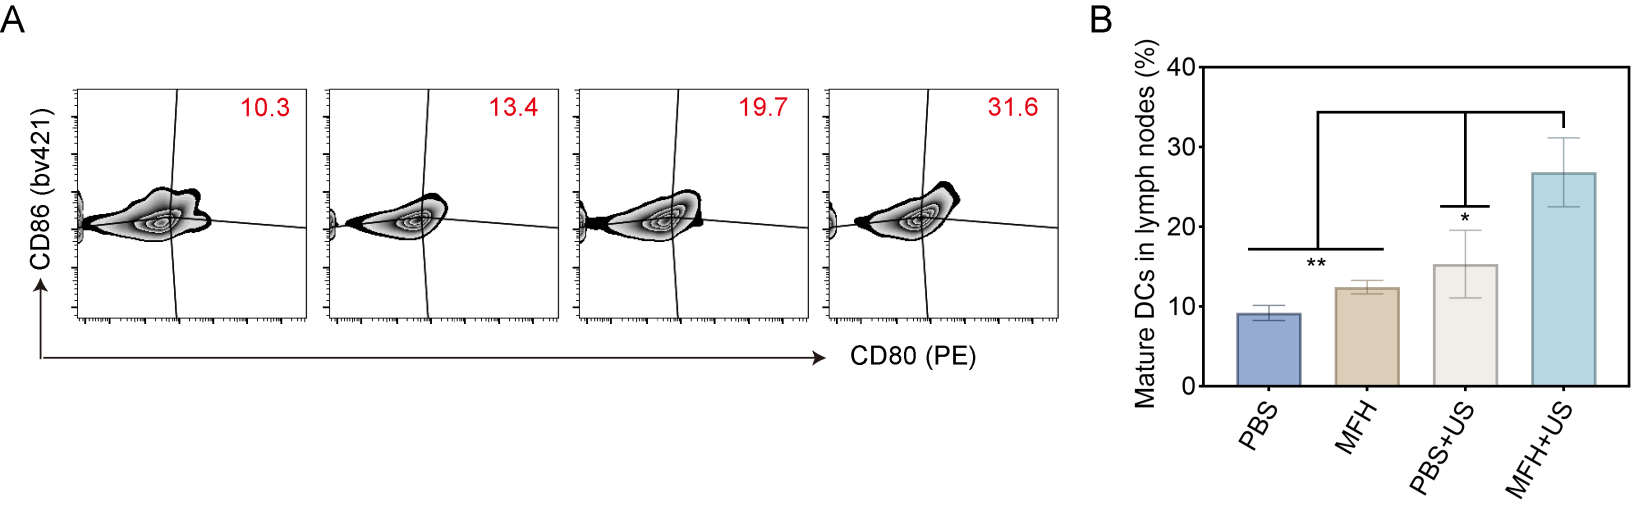


Fig. S17 (A) Representative FCM plots and (B) the percentages of matured DCs (CD80+ CD86+) in lymph nodes.


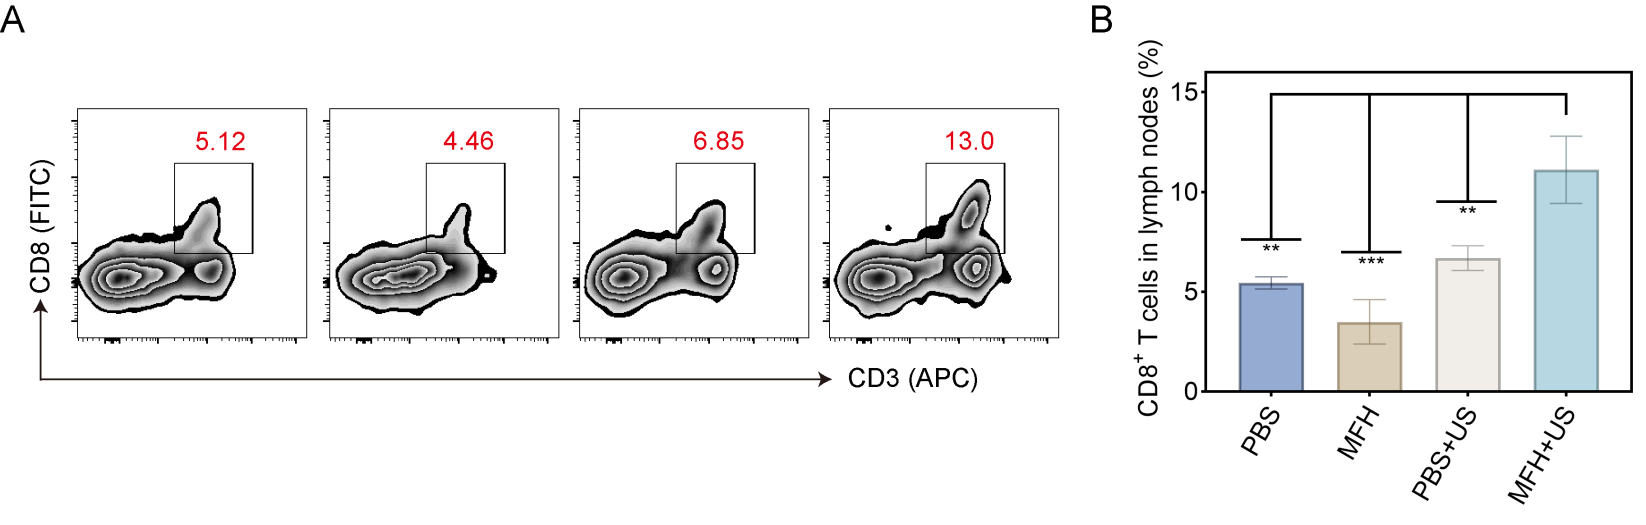


Fig. S18 (A) Representative FCM plots and (B) the percentages of CD8+T (CD3+ CD8+) cells in lymph nodes.
